# Supplementary material
Source: Springer Nature journal article supplement (https://www.springermedizin.de/resource/supplementary/12882_2013_753_MOESM2_ESM.pdf/9454610)

\* exercise recommendation  
(frequencies)

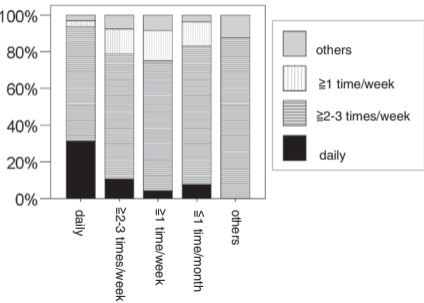

exercise recommendation  
(intensities)

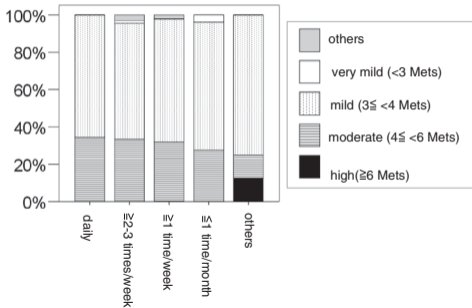

Supplement: MOESM2 [file 9454610]
